# Supplementary material for: Screening and Evaluation for Antixenosis Resistance in Wheat Accessions and Varieties to Grain Aphid, Sitobion miscanthi (Takahashi) (Hemiptera: Aphididae)
Source: MDPI journal article supplement (doi:10.3390/plants11081094), 2022-04-18

**Table S1.** Plant species, origin, number of winged aphids settled per plant counted after 24 and 48 hours of release to wheat seedlings, aphid resistance index and aphid resistance scale of *Sitobion miscanthi* on the wheat accessions screened for antixenosis resistance.

| Origin   | Province | Wheat accessions | Number of winged <i>S. miscanthi</i> settled after 24 hours |                  |                         |      | Number of winged <i>S. miscanthi</i> settled after 48 hours |                  |                         |      |
|----------|----------|------------------|-------------------------------------------------------------|------------------|-------------------------|------|-------------------------------------------------------------|------------------|-------------------------|------|
|          |          |                  | Number of aphids/ accessions                                | Resistance index | Resistance descriptions | Rank | Number of aphids/ accessions                                | Resistance index | Resistance descriptions | Rank |
| China    | Beijing  | Lunuan266        | 2.50                                                        | 0.29             | HR                      | 1    | 2.00                                                        | 0.29             | HR                      | 1    |
| Ethiopia | Amhara   | 243726           | 2.50                                                        | 0.29             | HR                      | 1    | 2.50                                                        | 0.36             | MR                      | 2    |
| Ethiopia | Tigray   | 213312           | 2.50                                                        | 0.29             | HR                      | 1    | 2.50                                                        | 0.36             | MR                      | 2    |
| Ethiopia | Tigray   | 8324             | 3.00                                                        | 0.35             | MR                      | 2    | 2.50                                                        | 0.36             | MR                      | 2    |
| Ethiopia | Tigray   | 243710           | 3.00                                                        | 0.35             | MR                      | 2    | 2.50                                                        | 0.36             | MR                      | 2    |
| Ethiopia | Amhara   | 7407             | 3.00                                                        | 0.35             | MR                      | 2    | 2.50                                                        | 0.36             | MR                      | 2    |
| Ethiopia | Amhara   | 7276             | 3.00                                                        | 0.35             | MR                      | 2    | 3.00                                                        | 0.43             | MR                      | 2    |
| Ethiopia | Amhara   | 203971           | 3.00                                                        | 0.35             | MR                      | 2    | 3.00                                                        | 0.43             | MR                      | 2    |
| Ethiopia | Tigray   | 207845           | 4.00                                                        | 0.46             | MR                      | 2    | 3.00                                                        | 0.43             | MR                      | 2    |
| Ethiopia | Tigray   | 243714           | 3.50                                                        | 0.40             | MR                      | 2    | 3.50                                                        | 0.50             | MR                      | 2    |
| Ethiopia | Amhara   | 7248             | 3.00                                                        | 0.35             | MR                      | 2    | 3.50                                                        | 0.50             | MR                      | 2    |
| Ethiopia | Amhara   | 227068           | 4.00                                                        | 0.46             | MR                      | 2    | 3.50                                                        | 0.50             | MR                      | 2    |
| Ethiopia | Amhara   | 216536           | 4.50                                                        | 0.52             | MR                      | 2    | 3.50                                                        | 0.50             | MR                      | 2    |
| Ethiopia | Amhara   | 7298             | 4.00                                                        | 0.46             | MR                      | 2    | 3.50                                                        | 0.50             | MR                      | 2    |
| Ethiopia | Amhara   | 222493           | 7.00                                                        | 0.81             | LR                      | 3    | 3.50                                                        | 0.50             | MR                      | 2    |
| Ethiopia | Tigray   | Mekelle -04      | 6.00                                                        | 0.69             | LR                      | 3    | 3.50                                                        | 0.50             | MR                      | 2    |
| China    | Beijing  | Longmaizi-1      | 4.50                                                        | 0.52             | MR                      | 2    | 3.50                                                        | 0.50             | MR                      | 2    |
| Ethiopia | Tigray   | 226251           | 4.50                                                        | 0.52             | MR                      | 2    | 4.00                                                        | 0.57             | MR                      | 2    |
| Ethiopia | Amhara   | 203773           | 5.00                                                        | 0.58             | MR                      | 2    | 4.00                                                        | 0.57             | MR                      | 2    |
| China    | Beijing  | Lunxuan145       | 5.50                                                        | 0.64             | LR                      | 3    | 4.00                                                        | 0.57             | MR                      | 2    |
| China    | Beijing  | k28              | 8.00                                                        | 0.92             | LS                      | 4    | 4.00                                                        | 0.57             | MR                      | 2    |
| China    | Beijing  | kechun-120832    | 4.50                                                        | 0.52             | MR                      | 2    | 4.00                                                        | 0.57             | MR                      | 2    |
| Ethiopia | Amhara   | 5173             | 5.50                                                        | 0.64             | LR                      | 3    | 4.00                                                        | 0.57             | MR                      | 2    |
| Ethiopia | Amhara   | 6844             | 7.50                                                        | 0.87             | LR                      | 3    | 4.00                                                        | 0.57             | MR                      | 2    |
| Ethiopia | Amhara   | 243732           | 5.50                                                        | 0.64             | LR                      | 3    | 4.00                                                        | 0.57             | MR                      | 2    |
| Ethiopia | Amhara   | 22625            | 3.00                                                        | 0.35             | MR                      | 2    | 4.00                                                        | 0.57             | MR                      | 2    |
| Ethiopia | Amhara   | 206530           | 7.00                                                        | 0.81             | LR                      | 3    | 4.50                                                        | 0.65             | LR                      | 3    |
| Ethiopia | Amhara   | 7281             | 5.00                                                        | 0.58             | MR                      | 2    | 4.50                                                        | 0.65             | LR                      | 3    |
| Ethiopia | Tigray   | Dandaa           | 8.50                                                        | 0.98             | LS                      | 4    | 4.50                                                        | 0.65             | LR                      | 3    |
| Ethiopia | Tigray   | 207855           | 5.50                                                        | 0.64             | LR                      | 3    | 4.50                                                        | 0.65             | LR                      | 3    |
| Ethiopia | Tigray   | kingbird         | 6.00                                                        | 0.69             | LR                      | 3    | 4.50                                                        | 0.65             | LR                      | 3    |
| China    | Beijing  | Kechun131031     | 7.00                                                        | 0.81             | LR                      | 3    | 4.50                                                        | 0.65             | LR                      | 3    |
| Ethiopia | Amhara   | 204511           | 6.00                                                        | 0.69             | LR                      | 3    | 4.50                                                        | 0.65             | LR                      | 3    |
| Ethiopia | Tigray   | Daka             | 8.50                                                        | 0.98             | LS                      | 4    | 4.50                                                        | 0.65             | LR                      | 3    |
| Ethiopia | Tigray   | 236293           | 8.50                                                        | 0.98             | LS                      | 4    | 4.50                                                        | 0.65             | LR                      | 3    |
| Ethiopia | Amhara   | 227067           | 6.00                                                        | 0.69             | LR                      | 3    | 4.50                                                        | 0.65             | LR                      | 3    |
| Ethiopia | Amhara   | 203968           | 8.50                                                        | 0.98             | LS                      | 4    | 4.50                                                        | 0.65             | LR                      | 3    |
| Ethiopia | Amhara   | 206561           | 5.50                                                        | 0.64             | LR                      | 3    | 4.50                                                        | 0.65             | LR                      | 3    |
| Ethiopia | Amhara   | 204363           | 7.50                                                        | 0.87             | LR                      | 3    | 5.00                                                        | 0.72             | LR                      | 3    |

|          |         |              |       |      |    |   |      |      |    |   |
|----------|---------|--------------|-------|------|----|---|------|------|----|---|
| Ethiopia | Amhara  | 7646         | 7.00  | 0.81 | LR | 3 | 5.00 | 0.72 | LR | 3 |
| Ethiopia | Amhara  | 203842       | 6.00  | 0.69 | LR | 3 | 5.00 | 0.72 | LR | 3 |
| Ethiopia | Amhara  | 226256       | 3.00  | 0.35 | MR | 2 | 5.00 | 0.72 | LR | 3 |
| Ethiopia | Amhara  | kakaba       | 4.00  | 0.46 | MR | 2 | 5.00 | 0.72 | LR | 3 |
| China    | Beijing | Lunxuan166   | 8.50  | 0.98 | LS | 4 | 5.00 | 0.72 | LR | 3 |
| China    | Beijing | Lunxuan103   | 7.50  | 0.87 | LR | 3 | 5.00 | 0.72 | LR | 3 |
| China    | Beijing | Kechun110182 | 10.50 | 1.21 | MS | 5 | 5.00 | 0.72 | LR | 3 |
| Ethiopia | Tigray  | 243720       | 12.00 | 1.39 | MS | 5 | 5.00 | 0.72 | LR | 3 |
| Ethiopia | Tigray  | Mekelle-01   | 6.00  | 0.69 | LR | 3 | 5.00 | 0.72 | LR | 3 |
| Ethiopia | Tigray  | 204409       | 8.00  | 0.92 | LS | 4 | 5.00 | 0.72 | LR | 3 |
| Ethiopia | Amhara  | 8231         | 8.00  | 0.92 | LS | 4 | 5.00 | 0.72 | LR | 3 |
| China    | Beijing | Kechun13290  | 11.00 | 1.27 | MS | 5 | 5.50 | 0.79 | LR | 3 |
| China    | Beijing | Lunxuan45    | 5.00  | 0.58 | MR | 2 | 5.50 | 0.79 | LR | 3 |
| China    | Beijing | Lunxuan061   | 7.00  | 0.81 | LS | 4 | 5.50 | 0.79 | LR | 3 |
| Ethiopia | Tigray  | Wane         | 3.50  | 0.40 | MR | 2 | 5.50 | 0.79 | LR | 3 |
| China    | Beijing | Yong 36021   | 8.00  | 0.92 | LS | 4 | 5.50 | 0.79 | LR | 3 |
| Ethiopia | Amhara  | 5171         | 8.00  | 0.92 | LS | 4 | 5.50 | 0.79 | LR | 3 |
| Ethiopia | Tigray  | 221740       | 18.00 | 2.08 | HS | 6 | 5.50 | 0.79 | LR | 3 |
| Ethiopia | Tigray  | 216631       | 6.00  | 0.69 | LR | 3 | 5.50 | 0.79 | LR | 3 |
| Ethiopia | Tigray  | 222439       | 5.00  | 0.58 | MR | 2 | 5.50 | 0.79 | LR | 3 |
| Ethiopia | Amhara  | 216537       | 7.50  | 0.87 | LR | 3 | 5.50 | 0.79 | LR | 3 |
| Ethiopia | Tigray  | Tay          | 4.00  | 0.46 | MR | 2 | 5.50 | 0.79 | LR | 3 |
| Ethiopia | Tigray  | 213320       | 5.00  | 0.58 | MR | 2 | 6.00 | 0.86 | LR | 3 |
| China    | Beijing | W23          | 3.50  | 0.40 | MR | 2 | 6.00 | 0.86 | LR | 3 |
| Ethiopia | Tigray  | 216448       | 3.00  | 0.35 | MR | 2 | 6.00 | 0.86 | LR | 3 |
| Ethiopia | Amhara  | 7565         | 5.00  | 0.58 | MR | 2 | 6.50 | 0.93 | LS | 4 |
| Ethiopia | Amhara  | Lunxuan16    | 4.00  | 0.46 | MR | 2 | 6.50 | 0.93 | LS | 4 |
| Ethiopia | Amhara  | 204476       | 8.50  | 0.98 | LS | 4 | 6.50 | 0.93 | LS | 4 |
| Ethiopia | Tigray  | 222821       | 7.50  | 0.87 | LR | 3 | 6.50 | 0.93 | LS | 4 |
| Ethiopia | Amhara  | 206564       | 11.50 | 1.33 | MS | 5 | 6.50 | 0.93 | LS | 4 |
| Ethiopia | Amhara  | 206604       | 8.50  | 0.98 | LS | 4 | 6.50 | 0.93 | LS | 4 |
| Ethiopia | Amhara  | 206590       | 8.00  | 0.92 | LS | 4 | 6.50 | 0.93 | LS | 4 |
| Ethiopia | Amhara  | 226944       | 5.50  | 0.64 | LR | 3 | 6.50 | 0.93 | LS | 4 |
| Ethiopia | Amhara  | 7285         | 9.00  | 1.04 | LS | 4 | 7.00 | 1.01 | LR | 4 |
| Ethiopia | Amhara  | 243697       | 5.00  | 0.58 | MR | 2 | 6.50 | 0.93 | LS | 4 |
| China    | Beijing | Lunxuan66    | 9.50  | 1.10 | LS | 4 | 6.50 | 0.93 | LS | 4 |
| Ethiopia | Tigray  | Alidero      | 10.00 | 1.16 | LS | 4 | 6.50 | 0.93 | LS | 4 |
| Ethiopia | Tigray  | Mekelle-03   | 9.00  | 1.04 | LR | 3 | 7.00 | 1.01 | LS | 4 |
| China    | Beijing | 2018NiaNpin  | 8.50  | 0.98 | LS | 4 | 7.00 | 1.01 | LS | 4 |
| Ethiopia | Amhara  | 227055       | 9.50  | 1.10 | LS | 4 | 7.00 | 1.01 | LS | 4 |
| Ethiopia | Tigray  | 243723       | 4.00  | 0.46 | MR | 2 | 7.00 | 1.01 | LS | 4 |
| Ethiopia | Amhara  | 7279         | 4.00  | 0.46 | MR | 2 | 7.00 | 1.01 | LS | 4 |
| Ethiopia | Amhara  | 216544       | 12.00 | 1.39 | MS | 2 | 7.00 | 1.01 | LS | 4 |
| Ethiopia | Tigray  | 206533       | 11.00 | 1.27 | MS | 2 | 7.00 | 1.01 | LS | 4 |
| Ethiopia | Tigray  | 7946         | 8.50  | 0.98 | LS | 4 | 7.00 | 1.01 | LS | 4 |
| Ethiopia | Amhara  | 206620       | 9.50  | 1.10 | LS | 4 | 7.00 | 1.01 | LS | 4 |
| Ethiopia | Amhara  | 216542       | 7.00  | 0.81 | LR | 3 | 7.00 | 1.01 | LS | 4 |
| Ethiopia | Tigray  | 216543       | 12.00 | 1.39 | MS | 5 | 7.50 | 1.08 | LS | 4 |
| Ethiopia | Amhara  | Ogolcho      | 11.00 | 1.27 | MS | 5 | 7.50 | 1.08 | LS | 4 |
| Ethiopia | Amhara  | 243704       | 10.50 | 1.21 | MS | 5 | 7.50 | 1.08 | LS | 4 |
| Ethiopia | Amhara  | 222494       | 10.00 | 1.16 | LS | 4 | 7.50 | 1.08 | LS | 4 |
| Ethiopia | Amhara  | 203755       | 11.00 | 1.27 | MS | 5 | 8.00 | 1.15 | LS | 4 |

|          |         |              |       |      |    |   |       |      |    |   |
|----------|---------|--------------|-------|------|----|---|-------|------|----|---|
| China    | Beijing | Lunxuan6     | 9.00  | 1.04 | LS | 4 | 8.00  | 1.15 | LS | 4 |
| Ethiopia | Tigray  | 243721       | 9.50  | 1.10 | LS | 4 | 8.00  | 1.15 | LS | 4 |
| Ethiopia | Amhara  | 7451         | 12.00 | 1.39 | MS | 5 | 8.50  | 1.22 | MS | 5 |
| Ethiopia | Amhara  | 5215         | 17.50 | 2.02 | HS | 6 | 8.50  | 1.22 | MS | 5 |
| Ethiopia | Amhara  | 243696       | 10.50 | 1.21 | MS | 5 | 8.50  | 1.22 | MS | 5 |
| China    | Beijing | Lunxuan13    | 15.50 | 1.79 | HS | 6 | 8.50  | 1.22 | MS | 5 |
| Ethiopia | Amhara  | 204585       | 13.00 | 1.50 | MS | 5 | 8.50  | 1.22 | MS | 5 |
| Ethiopia | Tigray  | 203703       | 11.50 | 1.33 | MS | 5 | 8.50  | 1.22 | MS | 5 |
| Ethiopia | Amhara  | 203754       | 10.50 | 1.21 | MS | 5 | 9.00  | 1.29 | MS | 5 |
| Ethiopia | Tigray  | Hidase       | 7.00  | 0.81 | LR | 4 | 9.00  | 1.29 | MS | 5 |
| Ethiopia | Amhara  | 7938         | 13.00 | 1.50 | MS | 5 | 9.00  | 1.29 | MS | 5 |
| Ethiopia | Tigray  | 213302       | 8.00  | 0.92 | LS | 4 | 9.00  | 1.29 | MS | 5 |
| Ethiopia | Amhara  | 204014       | 10.00 | 1.16 | LS | 4 | 9.00  | 1.29 | MS | 5 |
| Ethiopia | Tigray  | 216540       | 9.50  | 1.10 | LS | 4 | 9.50  | 1.36 | MS | 5 |
| Ethiopia | Amhara  | 206593       | 12.00 | 1.39 | MS | 5 | 9.50  | 1.36 | MS | 5 |
| Ethiopia | Tigray  | 243711       | 11.00 | 1.27 | MS | 5 | 10.00 | 1.44 | MS | 5 |
| Ethiopia | Amhara  | 8255         | 12.00 | 1.39 | MS | 5 | 10.00 | 1.44 | MS | 5 |
| Ethiopia | Amhara  | 7650         | 9.50  | 1.10 | LS | 4 | 10.00 | 1.44 | MS | 5 |
| Ethiopia | Tigray  | Paven76      | 14.50 | 1.68 | HS | 6 | 10.00 | 1.44 | MS | 5 |
| Ethiopia | Amhara  | 243734       | 5.00  | 0.58 | MR | 5 | 10.00 | 1.44 | MS | 5 |
| Ethiopia | Tigray  | 7253         | 16.00 | 1.85 | HS | 6 | 10.00 | 1.44 | MS | 5 |
| China    | Beijing | Lunxuan146   | 11.00 | 1.27 | MS | 5 | 10.50 | 1.51 | HS | 6 |
| Ethiopia | Amhara  | 216553       | 10.00 | 1.16 | LS | 4 | 11.00 | 1.58 | HS | 6 |
| Ethiopia | Tigray  | 206535       | 10.50 | 1.21 | MS | 5 | 11.50 | 1.65 | HS | 6 |
| Ethiopia | Amhara  | 7259         | 25.00 | 2.89 | HS | 6 | 11.50 | 1.65 | HS | 6 |
| Ethiopia | Tigray  | 213290       | 16.00 | 1.85 | HS | 6 | 11.50 | 1.65 | HS | 6 |
| Ethiopia | Amhara  | 243702       | 10.00 | 1.16 | LS | 4 | 11.50 | 1.65 | HS | 6 |
| Ethiopia | Tigray  | 243722       | 18.00 | 2.08 | HS | 6 | 12.00 | 1.72 | HS | 6 |
| Ethiopia | Amhara  | 7257         | 19.50 | 2.25 | HS | 6 | 12.00 | 1.72 | HS | 6 |
| Ethiopia | Amhara  | 216533       | 11.50 | 1.33 | MS | 5 | 12.00 | 1.72 | HS | 6 |
| Ethiopia | Amhara  | 222292       | 13.50 | 1.56 | HS | 6 | 12.00 | 1.72 | HS | 6 |
| China    | Beijing | Kechun150859 | 7.00  | 0.81 | LR | 4 | 12.50 | 1.80 | HS | 6 |
| Ethiopia | Amhara  | 243727       | 14.50 | 1.68 | HS | 6 | 12.50 | 1.80 | HS | 6 |
| Ethiopia | Amhara  | 7122         | 10.50 | 1.21 | MS | 5 | 12.50 | 1.80 | HS | 6 |
| China    | Beijing | Beijing 837  | 13.00 | 1.50 | MS | 5 | 12.50 | 1.80 | HS | 6 |
| Ethiopia | Amhara  | 206598       | 18.00 | 2.08 | HS | 6 | 13.50 | 1.94 | HS | 6 |
| Ethiopia | Tigray  | 236292       | 13.00 | 1.50 | MS | 5 | 14.50 | 2.08 | HS | 6 |
| Ethiopia | Tigray  | Shehan       | 12.50 | 1.45 | MS | 5 | 16.00 | 2.30 | HS | 6 |
| Ethiopia | Amhara  | 243731       | 19.00 | 2.20 | HS | 6 | 16.00 | 2.30 | HS | 6 |
| Ethiopia | Amhara  | 231487       | 23.00 | 2.66 | HS | 6 | 16.50 | 2.37 | HS | 6 |
| Ethiopia | Tigray  | Dereselign   | 11.00 | 1.27 | MS | 5 | 17.00 | 2.44 | HS | 6 |
| Ethiopia | Amhara  | 204586       | 13.00 | 1.50 | MS | 5 | 25.00 | 3.59 | HS | 6 |

N.B: Where, HR=highly resistance, MR= moderately resistance, LR= Lowly resistance, LS= Lowly susceptible, MS= moderately susceptible and HS= highly susceptible

**Figure S1.** Dendrogram clustering of 133 wheat accessions based on the number of winged *Sitobion miscanthi* settled after 48 hours of aphid released.

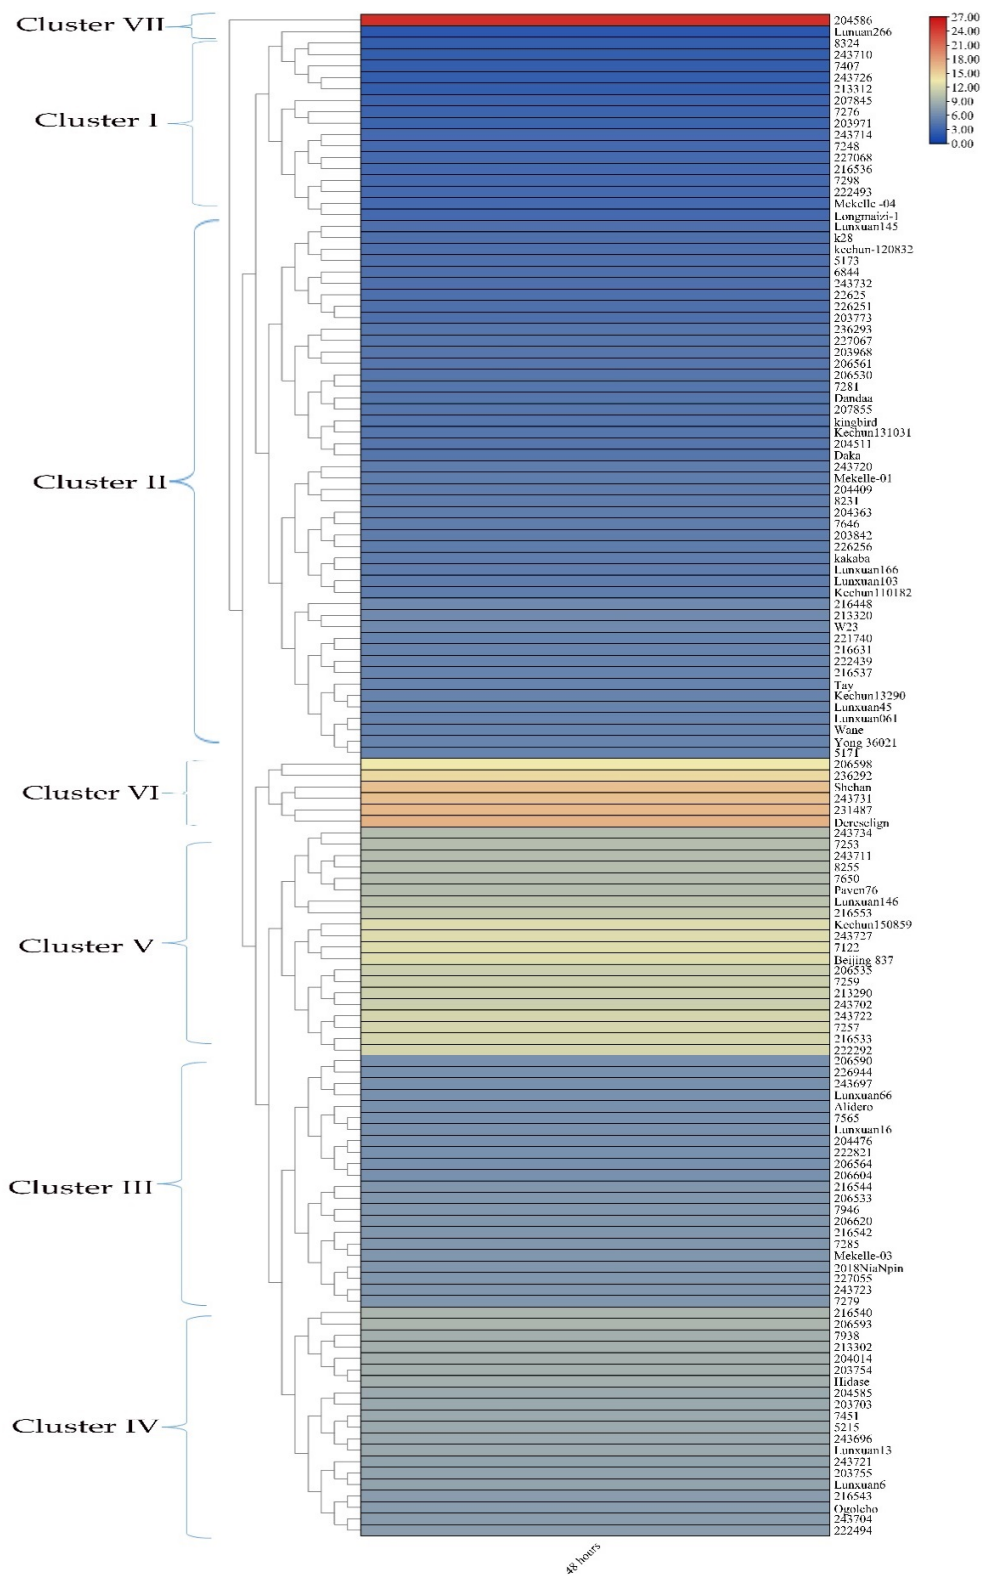

**Figure S2.** Seedling arrangement for preliminary antixenosis resistance Screening and aphid bioassay for further antixenosis test (choice test) inside m x 2 m x 1.5 m rectangular gauze cage. Note: doors were covered with black plastic.

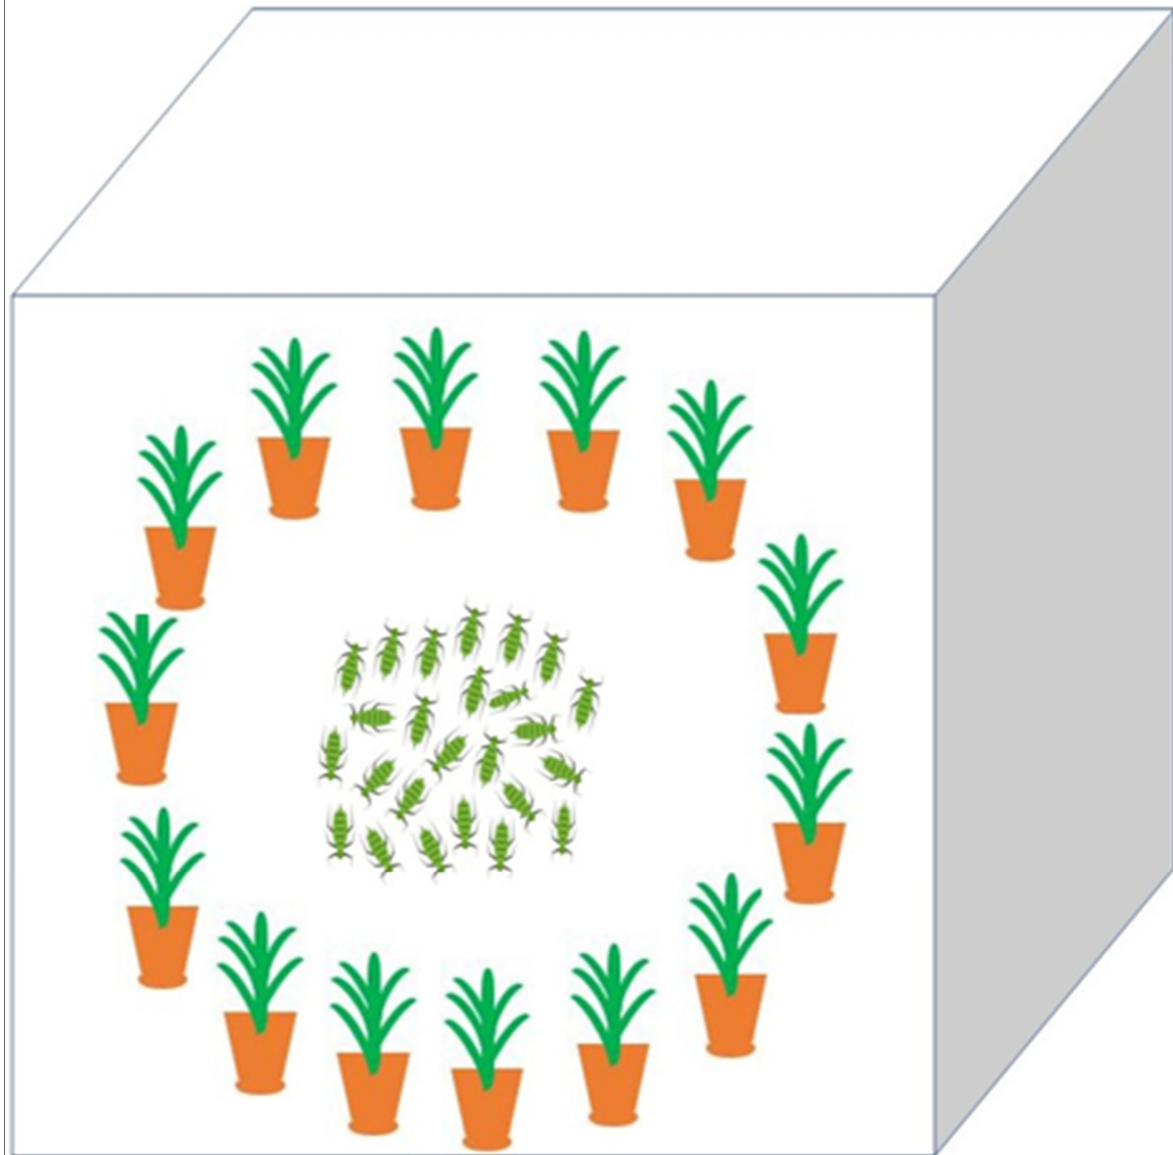

Supplement: s1 [file s1]
